# Supplementary material
Source: PubMed Central journal article supplement (PMC8456805)
Supplement: HEP-74-704-s003.pdf [file HEP-74-704-s003.pdf]

## **SUPPORTING INFORMATION**

### **B Cell-Intrinsic MyD88 and BCR Signaling Promote NASH by Driving Hepatic Inflammation and Fibrosis**

Fanta Barrow, Saad Khan, Gavin Fredrickson, Haiguang Wang, Katrina Dietsche, Preethy Parthiban, Sacha Robert, Thomas Kaiser, Shawn Winer, Adam Herman, Oyedele Adeyi, Marialena Mouzaki, Alexander Khoruts, Kristin A. Hogquist, Christopher Staley, Daniel A. Winer, and Xavier S. Revelo.

#### **Contact Information:**

Xavier S. Revelo, Ph.D.  
Cancer & Cardiovascular Research Building  
2231 6th St SE  
Minneapolis, MN 55455  
Phone: +1 (612) 301-7688  
Email: [xrevelo@umn.edu](mailto:xrevelo@umn.edu)

## SUPPLEMENTARY EXPERIMENTAL PROCEDURES

### Experimental Animals

Heterozygous mice were crossed to generate WT and  $\mu$ MT or Nur77<sup>GFP</sup> littermates. Cd19<sup>cre</sup> and MyD88<sup>fl</sup> were crossbred to generate Cd19<sup>cre</sup>MyD88<sup>fl/fl</sup> (B-MYD) and Cd19<sup>-/-</sup>MyD88<sup>fl/(-fl)</sup> (WT) littermate controls. All mice were male, age-matched, and housed in a standard pathogen-free environment.

### Metabolic Studies

Glucose tolerance tests (GTT), insulin tolerance tests (ITT), and pyruvate tolerance tests (PTT) were performed as previously described (1). Liver triglyceride content was measured using a colorimetric assay kit (Cayman Chemical). Serum ALT and AST were assessed by the Marshfield Laboratories (Marshfield Clinic Health System).

### Immune Cell Isolation and Characterization

Immune cells were isolated from perfused livers using density gradient centrifugation (2). Splenic, adipose tissue, and colon lamina propria immune cells were harvested as previously described (3). In cytometry by time-of-flight (CyTOF) analysis, cells were stained with 0.5  $\mu$ g of metal-conjugated primary antibodies (Fluidigm) for 30 mins at 4°C. Data was acquired on a CyTOF2 (DVS Sciences) and analyzed using Cytobank. For flow cytometry, cells were incubated with fluorophore-conjugated primary antibodies for 30 mins at 4°C. Flow cytometry data were acquired on a BD Fortessa X-20 (BD Biosciences) and analyzed using Flowjo software. Antibody information is provided in **Table S4**.

## **Detection of Intracellular Cytokines and ELISA**

For phorbol-myristate-acetate (PMA) stimulation,  $1 \times 10^6$  immune cells were stimulated with 1X PMA with protein transport inhibitor (eBioscience) for 5 hours. For TLR stimulations, cells were treated with 5  $\mu\text{g}/\text{mL}$  of LPS (eBioscience), 5  $\mu\text{M}$  of ODN1826 (Invivogen), or 150  $\text{ng}/\text{mL}$  of Pam3CSK4 (Invivogen) for 24 hours with a protein transport inhibitor (eBioscience) added for the last 12 hrs.

For ELISA measurement of cytokines, B cells (87% pure) were isolated from immune cell suspensions using the EasySep Pan-B cell isolation kit (StemCell Technologies). Macrophages (98% pure), and neutrophils (85% pure) were labeled using anti-F4/80 and -Ly6G microbeads and purified using LS columns and a MACS separator (Miltenyi Biotech). Two hundred thousand cells were stimulated with 5  $\mu\text{g}/\text{mL}$  of LPS for 5 days. The supernatant was collected and the amounts of tumor necrosis factor (TNF) $\alpha$  and interleukin (IL)-6 were quantified using the ELISA MAX kits (Biolegend).

## **Single-cell RNA sequencing**

Cells from each sample were individually incubated with 0.5  $\mu\text{g}$  of TotalSeq-A hashtag antibodies (Biolegend) for 30mins at 4C to allow for downstream multiplexing of samples. Samples were then combined and loaded into 2 capture ports of a 10X Genomics chip at a concentration of 1,500 cells/ $\mu\text{l}$ . Separate libraries were created for gene expression and HTO (cell hashing) and sequenced using a Novaseq S4 chip (2 x 150bp PE). Feature quantification was performed using cellranger (version 3.0, 10X Genomics). All subsequent analyses were performed using Seurat 3.1.1 (4). After sample demultiplexing of hashtag barcodes, we retained single cells and normalized within each pool using the

sctransform method in Seurat (4). Visualization of different clusters was enabled using Uniform Manifold Approximation and Projection (UMAP) dimensional reduction (5). The identity of cell types in these clusters was determined using SingleR (6). Differential expression testing was performed using the default Wilcoxon rank-sum test.

### **Bulk RNA Sequencing**

Total RNA was extracted from purified B cells using the RNeasy Plus Mini kit (Qiagen). Illumina sequencing libraries were created using the SMARTer Stranded RNA Pico Mammalian V2 kit (Takara Bio) and sequenced on a single lane in a NextSeq 550 instrument (Illumina) using the 75bp paired-end Mid Output Mode. Differential gene expression analysis was performed using edgeR (Bioconductor) and pathway analysis was completed using Ingenuity Pathway Analysis (IPA, Qiagen).

### **Quantitative Real Time-PCR**

Total RNA was extracted from livers using the RNeasy Plus Mini kit (Qiagen) and cDNA was prepped using the iScript cDNA Synthesis kit (Bio-Rad). Gene expression was normalized to GAPDH and changes in gene expression were calculated with the  $2^{-\Delta\Delta CT}$  method. Primers are listed in **Table S1**.

### **Histology**

Liver sections fixed in 10% formalin were assessed for steatosis and fibrosis by Masson's trichrome and hematoxylin & eosin (H&E) staining by the Biorepository & Laboratory Services at the University of Minnesota. The NAFLD activity score (NAS) was used to

semi-quantitatively evaluate histological features (7). A liver pathologist performed the blinded histological evaluation. The collagen volume fraction in Masson's trichrome staining images on 10X resolution was quantified using the Weka Trainable Segmentation plugin in FIJI software (ImageJ, version 1.52p). Approximately ten different sections per histological slice were analyzed. Blue staining of collagen deposition was segmented from the other colors using the plugin classifier. Images were then converted to RGB color and the segmented color of collagen was isolated using color thresholding. The percent area positive for collagen was calculated for each section using binary processing.

### **Anti-CD20 Treatment**

Mice were fed the HFHC diet for 6 weeks followed by intraperitoneal injections every 3 weeks with 250 µg of monoclonal anti-CD20 antibody (clone 5D2) or GP120 isotype control. Mice were euthanized 15 weeks after diet initiation.

### **Adoptive Transfer**

Splenic and hepatic B cells were isolated from WT mice fed the HFHC diet for 15 weeks.  $1 \times 10^6$  B cells from either the liver or spleen were intraperitoneally injected into 11-week HFHC-fed µMT recipient mice. Animals were euthanized 4 weeks after adoptive transfer.

### **Human Specimens**

Fecal samples were collected from patients with no infectious risk or antibiotic use in the last 3 months and processed within 2 hours of collection and screened for routine enteric pathogens, as previously described (8). For the assessment of B cells in the human liver,

we used specimens from a cohort of 18 NAFLD patients with varying degrees of disease followed at the University Health Network (2). Liver specimens were stained for hematoxylin and anti-human CD19 (Thermofischer scientific, clone LE-CD19), given a NAFLD Activity Score (NAS) followed by CD19<sup>+</sup> B cells enumeration per high power field (HPF = 0.237 mm<sup>2</sup>). Livers with a NAS  $\geq$  4 were considered to have progressed to NASH (9). Human liver specimens were obtained with approval by the Research Ethics Board at the University Health Network.

### **Fecal Microbiota Transplantation**

DNA was extracted from mouse and human stool samples, followed by amplification of the V4 hypervariable regions of the 16S rRNA gene and sequencing on the Illumina MiSeq platform. Reads were processed and sequences were aligned against the SILVA database. Taxonomy was assigned using the Ribosomal Database Project. The alpha diversity of microbial communities was determined using Shannon indices and SourceTracker software was used to determine the similarities between the recipient and donor operational taxonomic units (8).

## SUPPLEMENTARY RESULTS

### B Cells Accumulate in the Livers of a Cohort of NAFLD Patients

We assessed CD19<sup>+</sup> B cells in liver biopsies from a cohort of patients with varying degrees of NAFLD. We detected B cells in liver specimens of the NASH patients with a positive correlation between NAS and B cell infiltration in the hepatic lobular and portal areas. Of the 18 patient liver biopsies assessed, 7 presented NASH as defined by a NAS  $\geq 4$  (**Fig. A**). In agreement with a previous report (10), we detected B cells in liver specimens of the NASH patients (**Fig. B**) with a positive correlation between NAS and B cell infiltration in the hepatic lobular and portal areas (**Fig. C**). Accordingly, the patients that presented NASH (NAS  $\geq 4$ ) had increased lobular and portal B cells compared with those with fatty liver alone (**Fig. D**). These findings suggested that B cell accumulation was progressive and associated with the development of NASH in a cohort of patients.

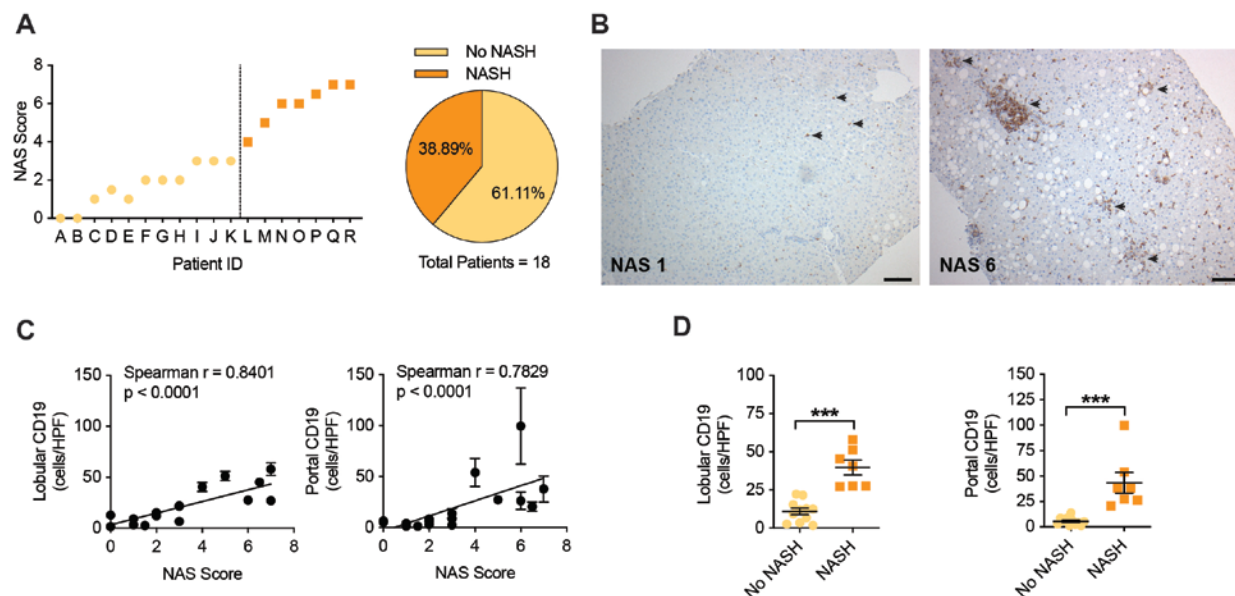

(A) NAS scores of patients in the NAFLD cohort (n = 18).

(B) Representative immunohistochemical staining of human liver biopsies (n = 18) given NAS scores and stained for CD19 (brown) indicated by arrows. Magnification, 200X. Scale bar, 100 $\mu$ m.

**(C)** Correlative analysis between NAS score and lobular (left) or portal tract (right) CD19<sup>+</sup> B cells per high power field (HPF, 0.237 mm<sup>2</sup>) of human liver biopsies (n = 18) as in (A). Spearman r values and p values denoting statistical significance are indicated in the figure graphs.

**(D)** Number of lobular (left) and portal tract (right) CD19<sup>+</sup> B cells in No NASH (n = 11) and NASH (n = 7) patients.



## SUPPLEMENTARY FIGURES

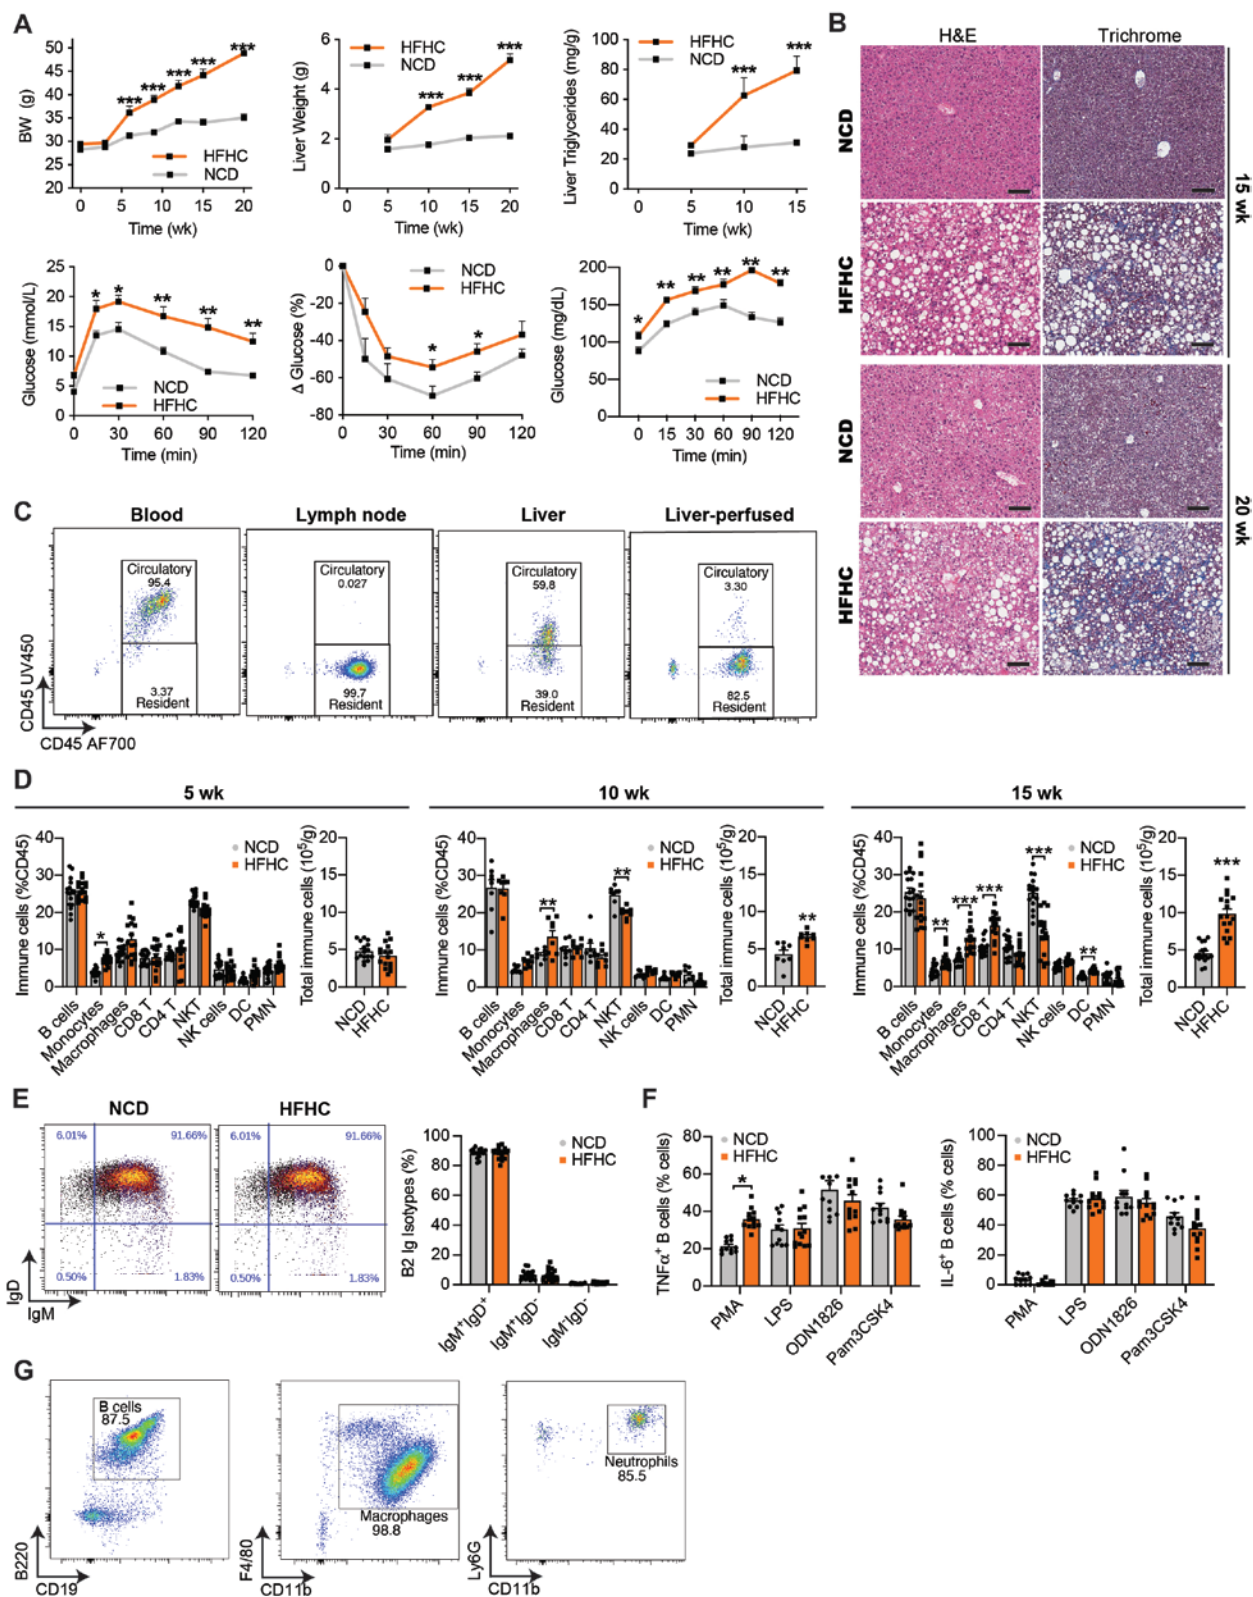

**Supplementary Fig. 1 (Related to Fig. 1). Additional Data for WT mice fed the NASH-Inducing Diet and Intrahepatic B Cell Phenotype**

**(A-B)** WT mice were fed either a normal control diet (NCD) or the NASH-inducing, high-fat, high-carbohydrate (HFHC) diet for up to 20 weeks.

**(A)** Body weights (upper left, n = 6 mice per group), liver weights (upper middle, n = 7-12 mice per group), liver triglyceride content (upper right, n = 5-6 mice per group), glucose tolerance test (lower left, n = 5 mice per group), insulin tolerance test (lower middle, n = 4-5 mice per group), and pyruvate tolerance test (lower right, n = 8 mice per group) after 15 weeks of dietary treatment.

**(B)** Representative H&E and trichrome liver stains (200X magnification, Scale bar, 100  $\mu$ m; n = 3 mice per stain)

**(C)** Flow cytometry plots showing circulatory and resident CD45<sup>+</sup> immune cells in the blood, lymph node, intact liver, and perfused liver. Circulatory and resident cells were assessed via intravenous injection of a UV450 anti-CD45 antibody that labels circulatory cells exclusively followed by ex vivo labeling of resident cells using an AF700 anti-CD45 antibody.

**(D)** Frequency (left) and total immune cell count (right) from CyTOF data (as in Fig. 1D) in mice fed either the NCD or HFHC diet for 5 (n = 15 mice per group), 10 (n = 8 mice per group), or 15 weeks (n = 16 mice per group).

**(E)** Representative mass cytometry plots (left) and quantification (right) of IgM<sup>+</sup> IgD<sup>+</sup> B2 cells (n = 16 mice per group).

**(F)** Frequency of TNF $\alpha$ <sup>+</sup> (middle) and IL-6<sup>+</sup> (right) B cells (as in Fig. 1G) after a 5-hr stimulation with PMA or the TLR agonists LPS (TLR4), ODN1826 (TLR9), and Pam3CSK4 (TLR1 and 2) in mice fed either an NCD or HFHC for 15 weeks (n = 12 mice per group).

**(G)** Frequency of CD19<sup>+</sup> B220<sup>+</sup> B cells, CD11b<sup>+</sup> F4/80<sup>+</sup> macrophages, and CD11b<sup>+</sup> Ly6G<sup>+</sup> gated from CD45<sup>+</sup> immune cells following immunomagnetic purification (n = 2 pooled mice per cell type).

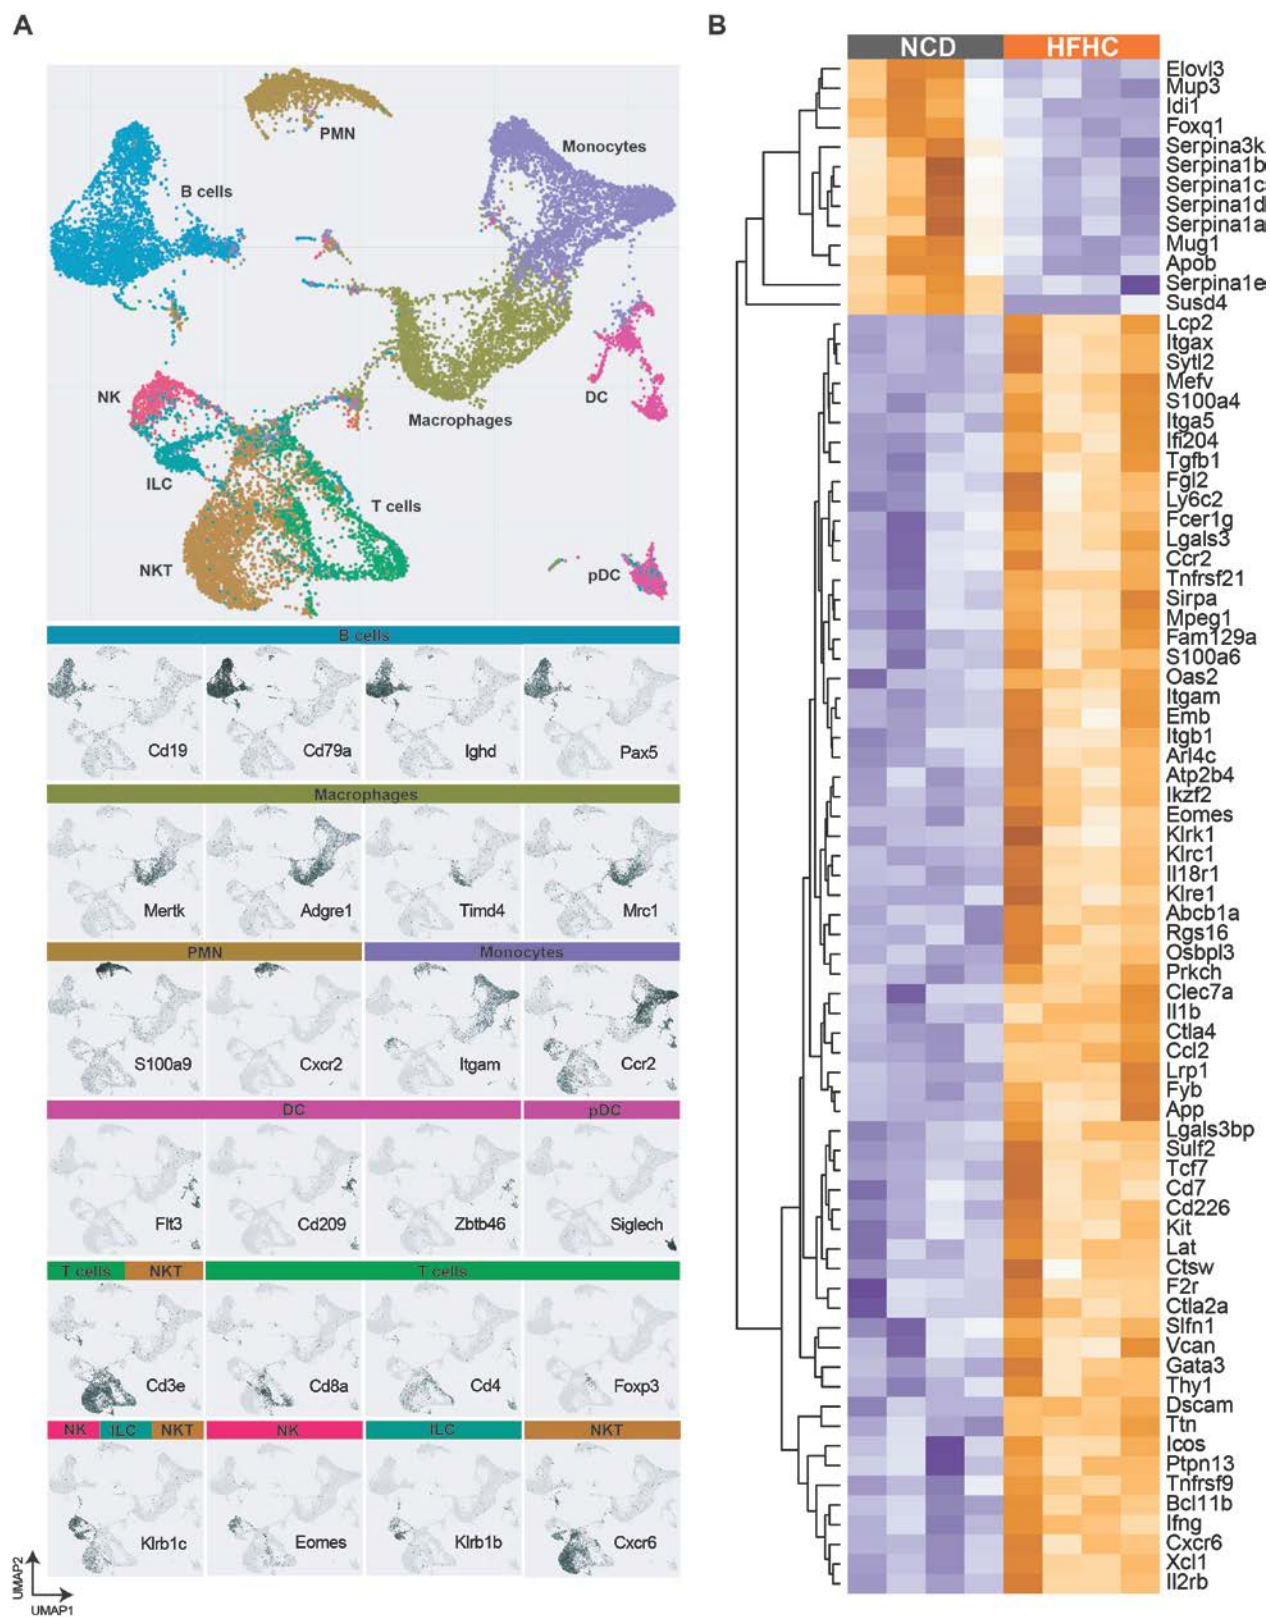

**(A)** Immune cell subsets identified in intrahepatic immune cells using single-cell RNA sequencing (top) and UMAP projections of immune cells showing the expression of characteristic marker genes (bottom). Cells were isolated from the liver of NCD (n = 4) and HFHC (n = 5) mice.

**(B)** Hierarchical Heatmap of the Top Differentially Expressed Genes in B Cells from NASH Livers. B cells were purified from the liver of WT mice fed either an NCD or HFHC for 15 weeks and their gene expression was assessed by RNA-sequencing (n = 4 mice per group, FDR-corrected  $P < 0.05$ ).

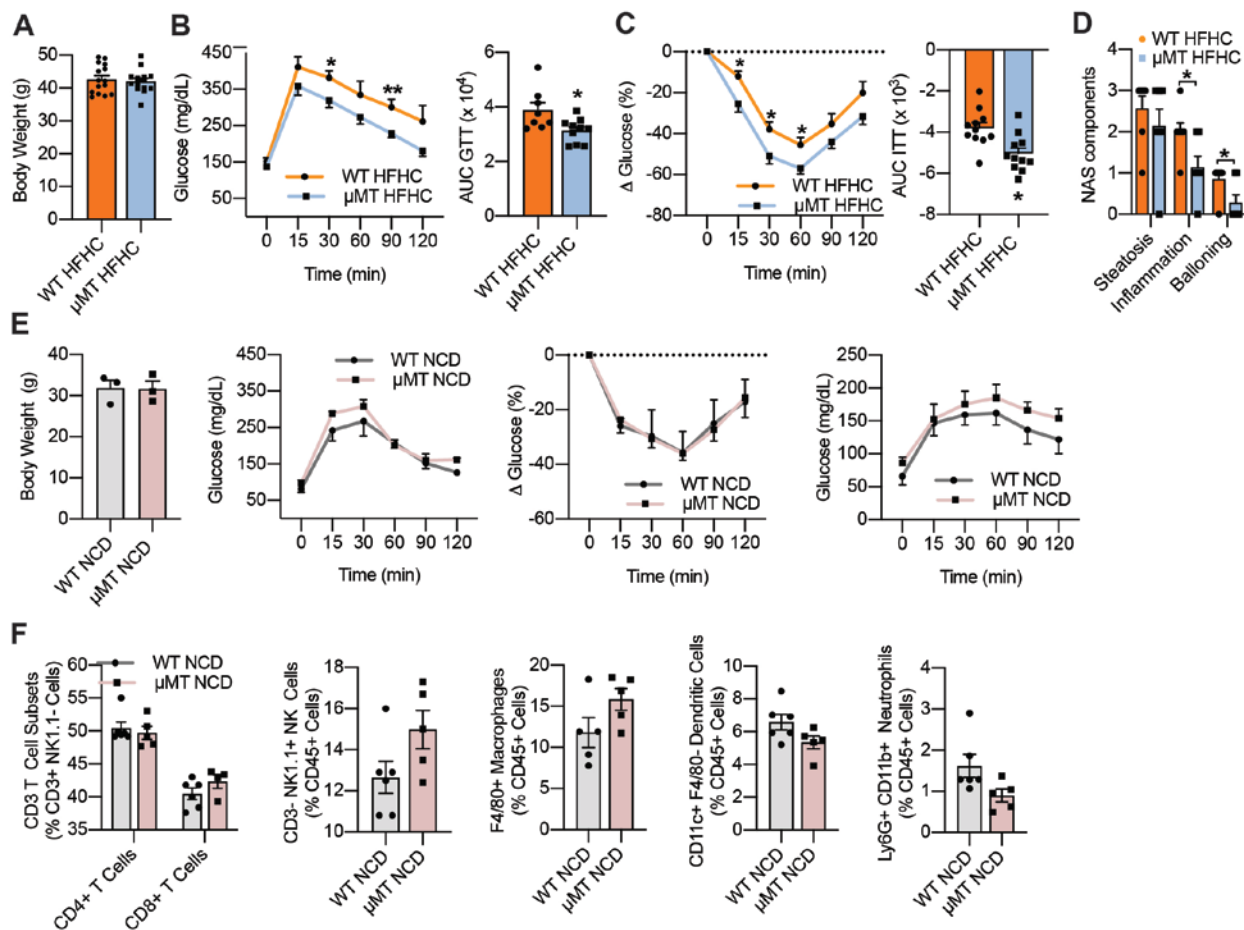

### Supplementary Fig. 3 (Related to Fig. 3). Additional Data for NCD- and HFHC-fed $\mu$ MT Mice

(A) Body weight (n = 15 mice per group).

(B) Glucose tolerance test (GTT, left) with corresponding areas under the curves (AUC, right; n = 8-10 mice per group) of WT and  $\mu$ MT mice fed the high-fat, high-carbohydrate (HFHC) diet for 15 weeks.

(C) Insulin tolerance test (ITT, left) with corresponding areas under the curves (AUC, right; n = 11-12 mice per group) of WT and  $\mu$ MT mice fed the HFHC diet for 15 weeks.

(D) NAS component scoring of H&E histology sections (n = 7 mice per group).

(E) Body-weight, GTT, ITT, and PTT of WT and  $\mu$ MT mice (n = 3 mice per group) fed a normal control diet (NCD) for 15 weeks.

(F) Frequency of intrahepatic T cells, NK cells, macrophages, dendritic cells, and neutrophils in WT and  $\mu$ MT mice (n = 3 mice per group) fed a NCD for 15 weeks.



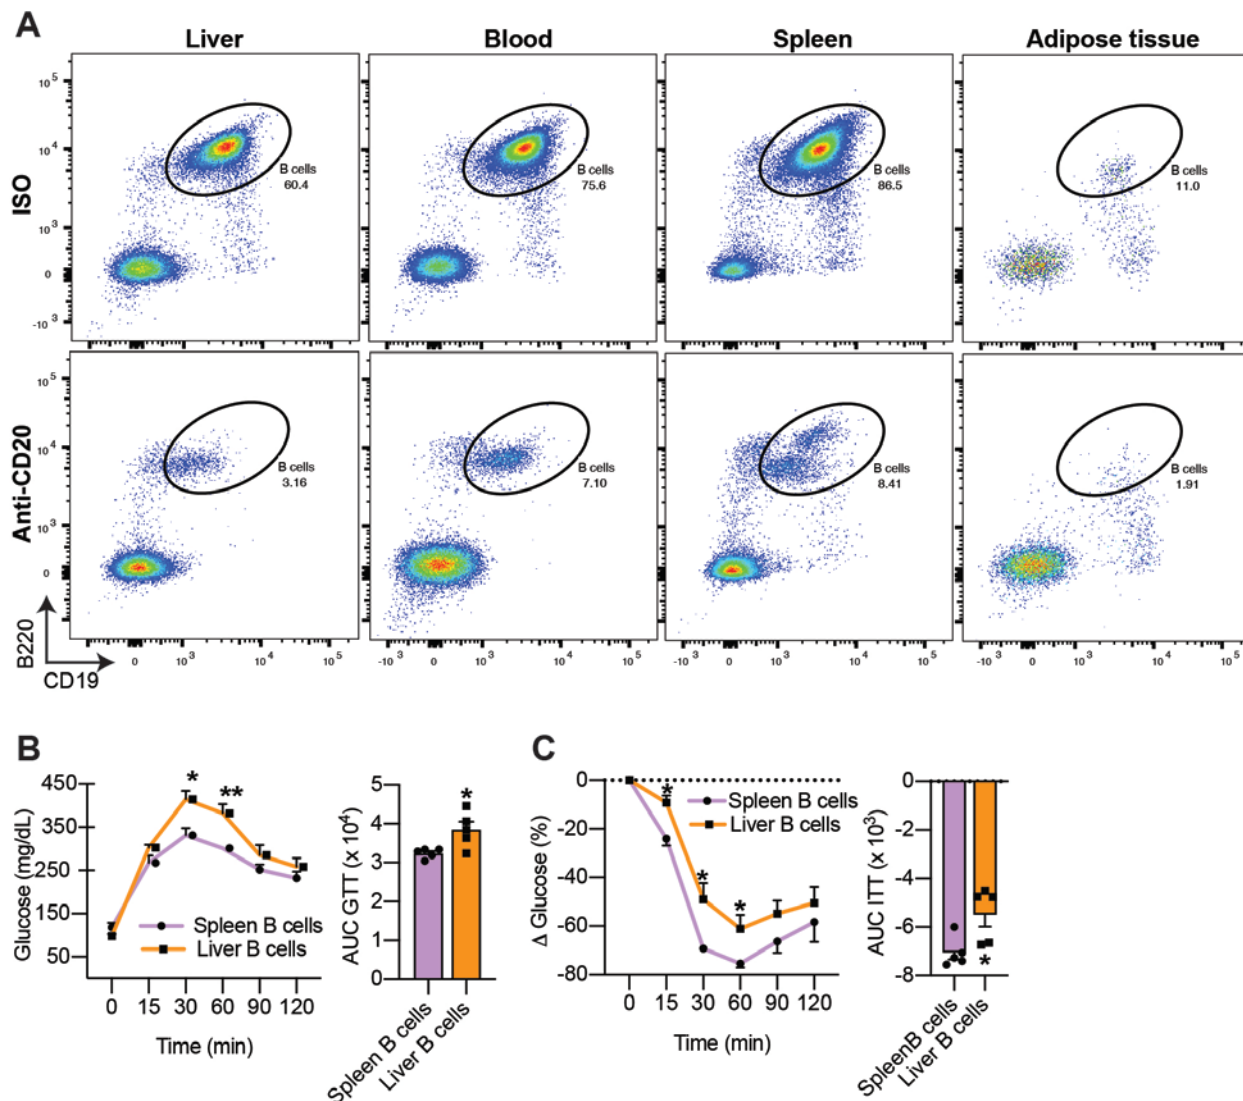

### Supplementary Fig. 4 (Related to Fig. 4). Additional Data for CD20 mAb and Metabolic Data for Adoptive Transfer Experiment

(A) Representative flow cytometry plots showing CD19<sup>+</sup> B220<sup>+</sup> B cells in the liver, blood, spleen, and adipose tissue of WT mice 3 weeks after injection of a single dose of 250 mg anti-CD20 antibody (CD20 mAb, n = 3 mice).

(B-C) B cells ( $1 \times 10^6$ ) were purified from either the spleen or liver of WT donor mice fed the HFHC diet for 15 weeks and adoptively transfer via intraperitoneal injection into  $\mu$ MT recipient mice fed the HFHC diet for 11 weeks. Experiments were performed 4 weeks after adoptive transfer.

(B) Glucose tolerance test (GTT, left) with corresponding areas under the curves (AUC, right; n = 5 mice per group).

(C) Insulin tolerance test (ITT, left) with corresponding areas under the curves (AUC, right; n = 5 mice per group).

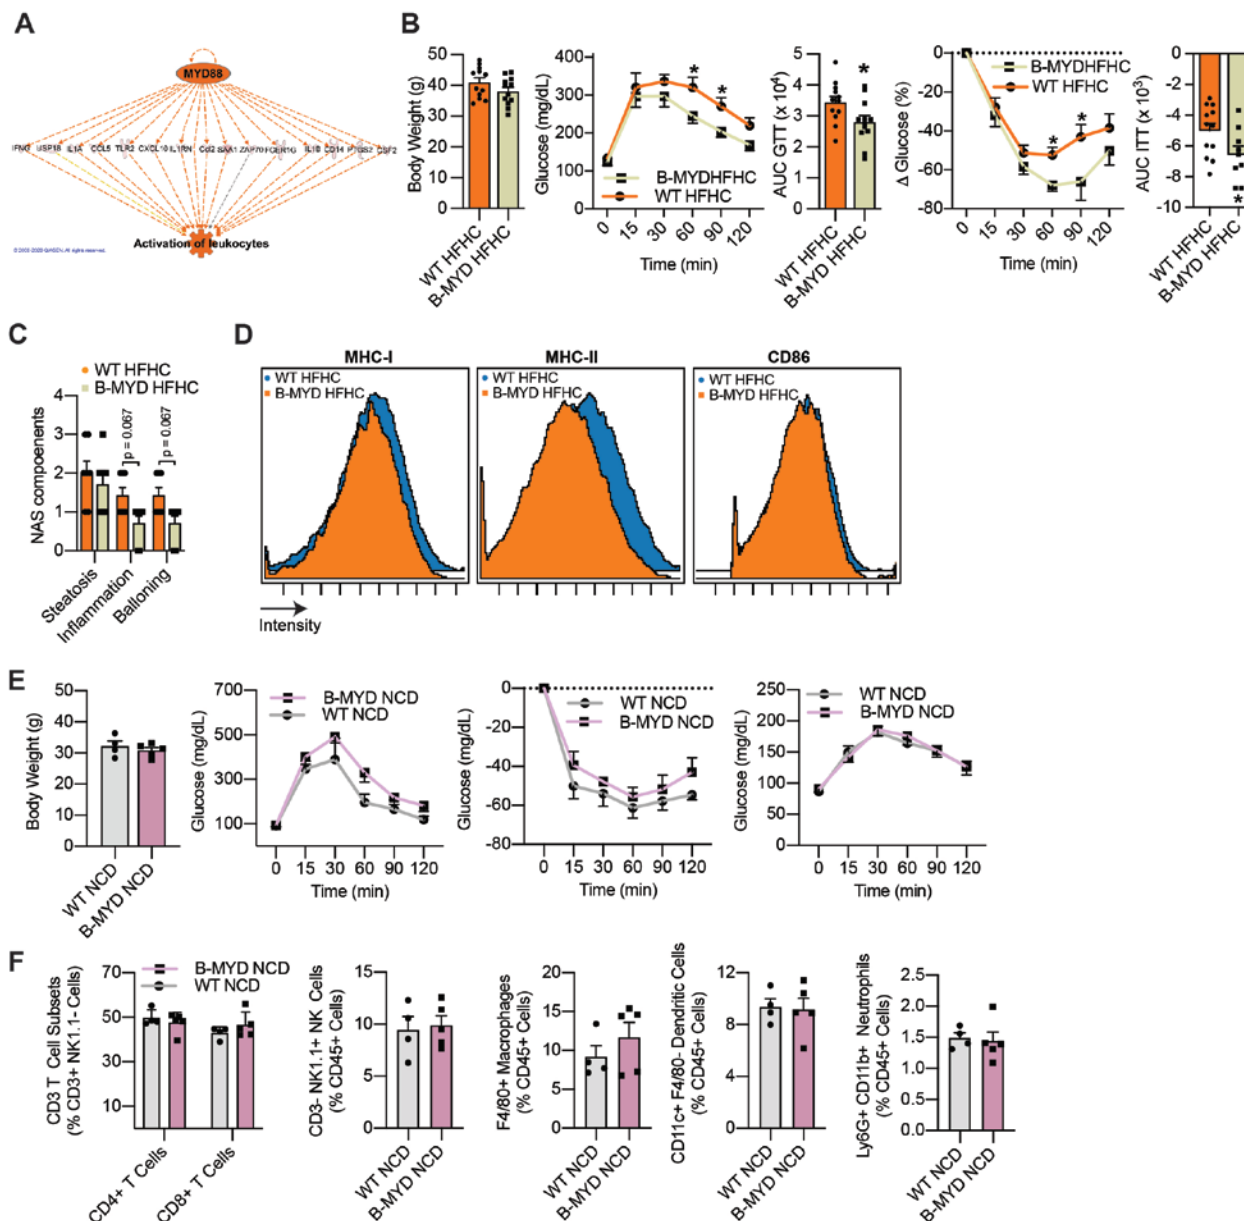

### Supplementary Fig. 5 (Related to Fig. 5). Additional Data for NCD- and HFHC-fed B-MYD mice

(A) Upstream Regulator Analysis of MyD88 generated from Ingenuity Pathway Analysis (IPA) from Fig. 2. Used with permission from QIAGEN.

(B) Body weight (left,  $n = 12$  mice per group), glucose tolerance test (GTT, middle) with corresponding areas under the curves (AUC, right;  $n = 12$  mice per group), and insulin tolerance test (ITT, right) with corresponding areas under the curves (AUC, right;  $n = 12$  mice per group).

(C) NAS component scoring of H&E histology sections ( $n = 7$  mice per group).

**(D)** Representative CyTOF histograms of mean intensity showing the B cell expression of MHC-I (left), MHC-II (middle), and CD86 (right) in mice HFHC B-MYD mice (as in Fig. 5H).

**(E)** Body-weight, glucose tolerance test, insulin tolerance test, and pyruvate tolerance test of WT and B-MYD mice (n = 4-5 mice per group) fed a normal control diet (NCD) for 15 weeks.

**(F)** Frequency of intrahepatic T cells, NK cells, macrophages, dendritic cells, and neutrophils in WT and B-MYD mice (n = 4-5 mice per group) fed a NCD for 15 weeks.



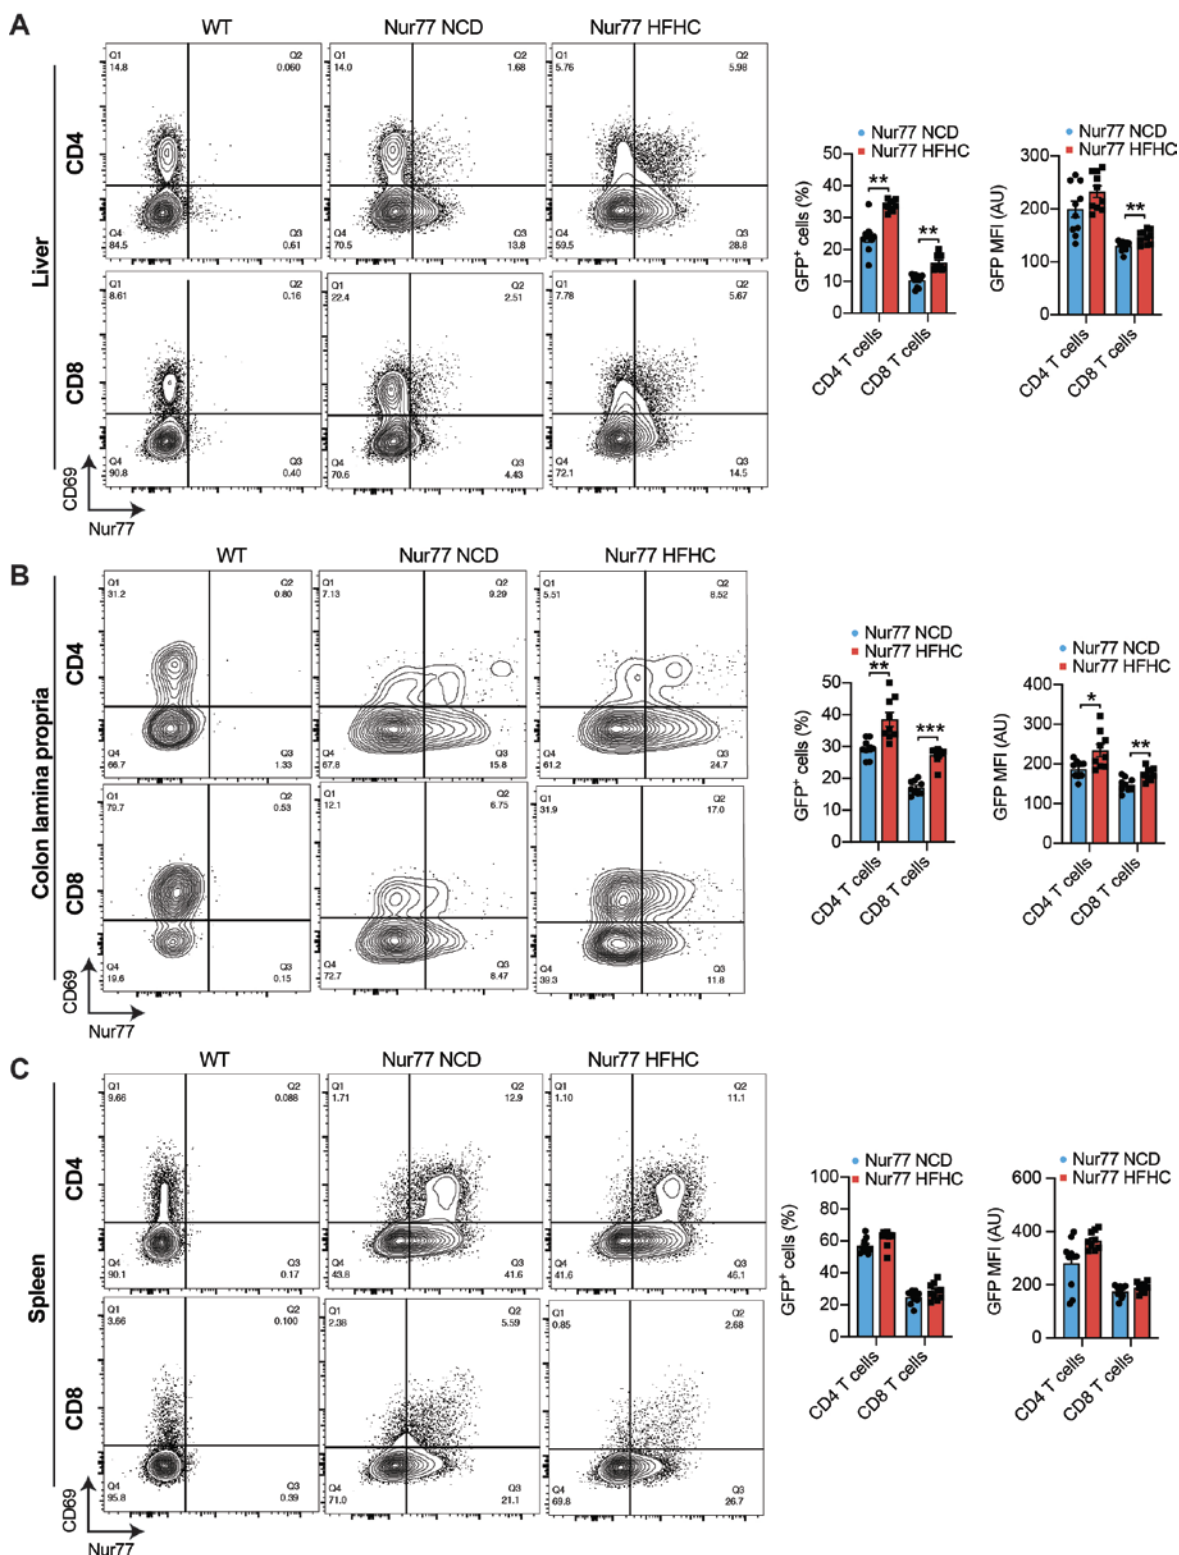

### Supplementary Fig. 6 (Related to Fig. 6). Additional Data for Nur77-GFP mice

(A) Representative flow cytometry plots (left) and quantification (right) of intrahepatic GFP<sup>+</sup> CD69<sup>-</sup> CD4 and CD8 T cells (n = 10 mice per group).

**(B)** Representative flow cytometry plots (left) and quantification (right) of colon lamina propria GFP<sup>+</sup> CD69<sup>-</sup> CD4 and CD8 T cells (n = 10 mice per group).

**(C)** Representative flow cytometry plots (left) and quantification (right) of splenic GFP<sup>+</sup> CD69<sup>-</sup> CD4 and CD8 T cells (n = 10 mice per group).

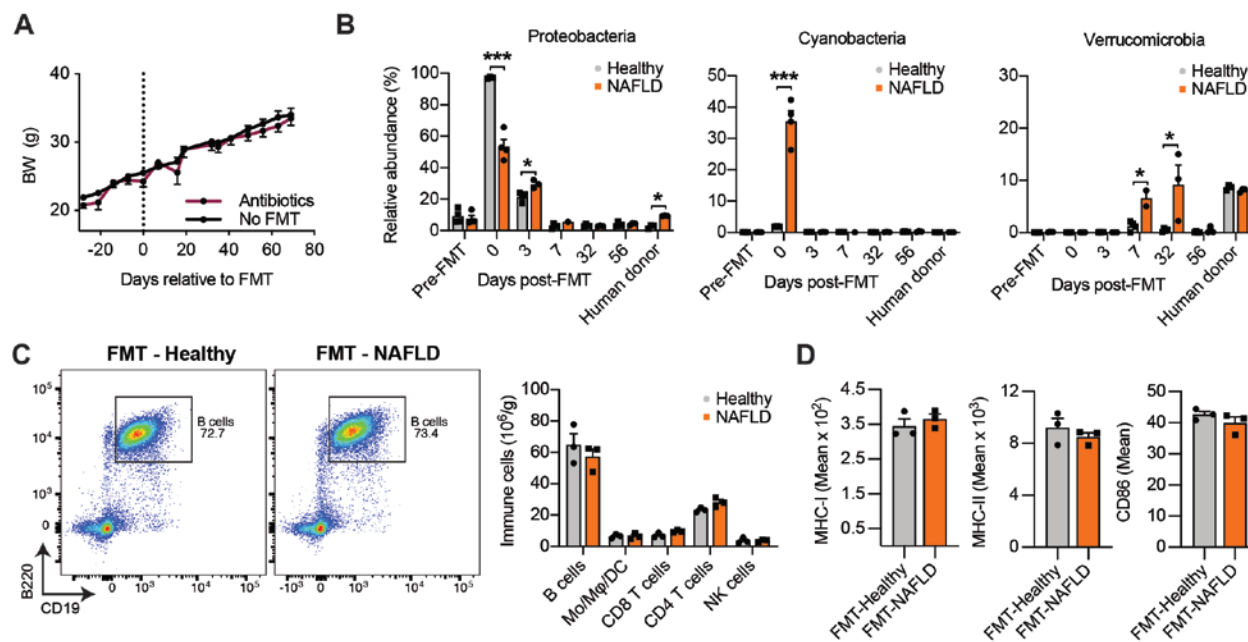

### Supplementary Fig. 7 (Related to Fig. 7). Additional Data for Fecal Microbiota Transplantation Experiments

(A) Body weight of WT mice fed a normal control diet (NCD) that were left untreated (No FMT) or received antibiotics in the drinking water for 21 days but did not receive an FMT (n = 7-8 mice per group).

(B) Abundance of *Proteobacteria* (left), *Cyanobacteria* (middle), and *Verrucomicrobia* (right) in fecal communities of human donors (1 healthy and 1 NAFLD patient) and recipient mice at different timepoints relative to the FMT (n = 3-4 mice per group).

(C) Representative flow cytometry plot showing CD19+ B220+ B cells (left) and number (right) of splenic B cells, monocytes (Mo), macrophages (Mφ), dendritic cells (DC), CD4 and CD8 T cells, and natural killer (NK) cells (right, n = 6-7 mice per group) in recipient mice 10 weeks post-FMT.

(D) Mean intensity of splenic B cell expression of MHC-I (left), MHC-II (middle), and CD86 (right, n = 4 mice per group) in recipient mice 10 weeks post-FMT.

Supplementary Table 1. qRT-PCR Primer Sequences

| Primer        | Sequence                                                                               | Source                      |
|---------------|----------------------------------------------------------------------------------------|-----------------------------|
| <i>Actb</i>   | Forward: 5'-TGTTACCAACTGGGACGACA-3'<br>Reverse: 5'-CTTTTCACGGTTGGCCTTAG-3'             | Integrated DNA Technologies |
| <i>Gapdh</i>  | Forward: 5'-AACGACCCCTTCATTGAC-3'<br>Reverse: 5'-TCCACGACATACTCAGCAC-3'                | Integrated DNA Technologies |
| <i>Acta2</i>  | Forward: 5'-GGCTCTGGGCTCTGTAAGG-3'<br>Reverse: 5'-CTCTTGCTCTGGGCTTCATC-3'              | Integrated DNA Technologies |
| <i>Col1a1</i> | Forward: 5'-ACATGTTTCAGCTTTGTGGACC-3'<br>Reverse: 5'-TAGGCCATTGTGTATGCAGC-3'           | Integrated DNA Technologies |
| <i>Tgfb1</i>  | Forward: 5'-GGTTCATGTCATGGATGGTGC-3'<br>Reverse: 5'-TGACGTCCTGGAGTTGTACGG-3'           | Integrated DNA Technologies |
| <i>Mmp2</i>   | Forward: 5'-TTCCCCCGCAAGCCCAAGTG-3'<br>Reverse: 5'-GAGAAAAGCGCAGCGGAGTGACG-3'          | Integrated DNA Technologies |
| <i>Timp1</i>  | Forward: 5'-GCATCTCTGGCATCTGGCATC-3'<br>Reverse: 5'-GCGGTTCTGGGACTTGTGGGC-3'           | Integrated DNA Technologies |
| <i>Tnfa</i>   | Forward: 5'-GTAGCCCACGTCGTAGCAAAC-3'<br>Reverse: 5'-AGTTGGTTGTCTTTGAGATCCATG-3'        | Integrated DNA Technologies |
| <i>Icam1</i>  | Forward: 5'-CGTGTGCCATGCCTTTAGCT-3'<br>Reverse: 5'-TCCAGTTATTTTGGAGGTGGTACAGTACTG-3'   | Integrated DNA Technologies |
| <i>Sele</i>   | Forward: 5'-AGATACTTTCGGAAGAAAGCAAAGAA-3'<br>Reverse: 5'-GTAAGAAGGCACATGGTAGTTTTCAA-3' | Integrated DNA Technologies |
| <i>Inos</i>   | Forward: 5'-CCGAAGCAAACATCACATTCA-3'<br>Reverse: 5'-GGTCTAAAGGCTCCGGGCT-3'             | Integrated DNA Technologies |
| <i>Il1b</i>   | Forward: 5'-ACCCTGCAGCTGGAGAGTGT-3'<br>Reverse: 5'-TTGACTTCTATCTGTTGAAGACAAACC-3'      | Integrated DNA Technologies |

*Actb*, Beta-actin; *Gapdh*, glyceraldehyde-3-phosphate dehydrogenase; *Acta2*, actin alpha 2, smooth muscle; *Col1a1*, collagen type I alpha 1; *Tgfb1*, transforming growth factor, beta; *Mmp2*, matrix metalloproteinase 2; *Tnfa*, tumor necrosis factor-alpha; *Icam1*, intercellular adhesion molecule 1; *Sele*, e-selectin; *Inos*, nitric oxide synthase 2, inducible; *Il1b*, interleukin 1 beta.

**Supplementary Table 2. Human Microbiota Donor Information**

| Donor   | Group       | BMI                           | ALT (U/L) | AST (U/L) | ALK P (U/L) | Origen                                          |
|---------|-------------|-------------------------------|-----------|-----------|-------------|-------------------------------------------------|
| Lean    | Healthy     | < 85 <sup>th</sup> percentile | NA        | NA        | NA          | Minnesota Microbiota Therapeutics Donor Program |
| NAFLD A | Obese/NAFLD | NA                            | 504       | 291       | 155         | Minnesota Microbiota Therapeutics Donor Program |
| NAFLD B | Obese/NAFLD | 34.8                          | 75        | 25        | 69          | Cincinnati Children's Hospital                  |
| NAFLD C | Obese/NAFLD | 30.58                         | 135       | 55        | 295         | Cincinnati Children's Hospital                  |

**Supplementary Table 3. Differentially Expressed Genes between NCD and HFHC B cells from the Single-Cell RNA-Sequencing Analysis**

| Gene     | Avg_logFC   | P_val_adj   | Pct.1 | Pct.2 | P_val    |
|----------|-------------|-------------|-------|-------|----------|
| S100a9   | 12.20854356 | 0.000990961 | 0.504 | 0.419 | 3.30E-07 |
| S100a8   | 11.3329318  | 0.002149947 | 0.48  | 0.429 | 7.17E-07 |
| Slpi     | 11.08925063 | 0.008439727 | 0.389 | 0.333 | 2.81E-06 |
| Cxcl2    | 10.90959291 | 0.002127303 | 0.359 | 0.296 | 7.09E-07 |
| Cxcr4    | 9.850594178 | 2.56E-05    | 0.433 | 0.358 | 8.54E-09 |
| Trem1    | 8.471630098 | 0.038061751 | 0.41  | 0.34  | 1.27E-05 |
| Il1b     | 5.963938441 | 4.32E-05    | 0.385 | 0.318 | 1.44E-08 |
| G0s2     | 4.461795323 | 0.023162173 | 0.457 | 0.383 | 7.72E-06 |
| Btla     | 4.333383455 | 0.043688212 | 0.544 | 0.502 | 1.46E-05 |
| Gm8369   | 3.95185176  | 2.62E-08    | 0.484 | 0.379 | 8.74E-12 |
| mt-Cytb  | 3.777380286 | 0.043707067 | 0.667 | 0.616 | 1.46E-05 |
| Pgap1    | 3.746169031 | 0.000709674 | 0.517 | 0.428 | 2.37E-07 |
| Hdc      | 3.603389294 | 0.000255986 | 0.428 | 0.361 | 8.53E-08 |
| Trim34a  | 3.211456867 | 0.004099007 | 0.426 | 0.358 | 1.37E-06 |
| H2-Ab1   | 3.074635785 | 0.000126462 | 0.737 | 0.64  | 4.22E-08 |
| Hist1h1d | 1.68507578  | 0.000182349 | 0.256 | 0.191 | 6.08E-08 |
| Jam2     | 1.662550927 | 0.013892724 | 0.28  | 0.209 | 4.63E-06 |
| Man1a    | 1.619313335 | 0.045707981 | 0.548 | 0.492 | 1.52E-05 |
| Ehd3     | 1.473283872 | 0.000135028 | 0.267 | 0.213 | 4.50E-08 |
| Stk17b   | 1.448220836 | 5.69E-10    | 0.693 | 0.623 | 1.90E-13 |
| Gimap6   | 1.378067447 | 5.41E-05    | 0.569 | 0.492 | 1.80E-08 |
| Meis2    | 1.362078578 | 0.010870335 | 0.302 | 0.236 | 3.62E-06 |
| Cd74     | 1.310117008 | 4.29E-05    | 0.92  | 0.883 | 1.43E-08 |
| Stap1    | 1.190943337 | 0.006954336 | 0.528 | 0.445 | 2.32E-06 |
| H2-Eb1   | 1.188566958 | 0.000162873 | 0.708 | 0.606 | 5.43E-08 |
| Bmp2     | 1.087868672 | 0.003548942 | 0.257 | 0.202 | 1.18E-06 |
| Folr2    | 0.957113297 | 0.007911914 | 0.253 | 0.191 | 2.64E-06 |
| Abca1    | 0.942403007 | 7.15E-15    | 0.317 | 0.211 | 2.38E-18 |
| Ighd     | 0.869190655 | 1.06E-07    | 0.808 | 0.719 | 3.54E-11 |
| Cd33     | 0.824619097 | 0.02050278  | 0.334 | 0.246 | 6.83E-06 |
| Zfp36l1  | 0.798086881 | 4.17E-06    | 0.695 | 0.629 | 1.39E-09 |
| Gas6     | 0.761528329 | 0.003713727 | 0.288 | 0.209 | 1.24E-06 |
| Fcer2a   | 0.674065567 | 0.002662384 | 0.602 | 0.518 | 8.87E-07 |
| Rasgrp3  | 0.58327776  | 0.000276438 | 0.368 | 0.276 | 9.21E-08 |
| Aass     | 0.550130127 | 0.024076902 | 0.27  | 0.202 | 8.03E-06 |
| Fcgr2b   | 0.475690416 | 0.010696229 | 0.322 | 0.28  | 3.57E-06 |
| Adgrf5   | 0.430478093 | 0.003420783 | 0.296 | 0.232 | 1.14E-06 |

---

|           |              |             |       |       |          |
|-----------|--------------|-------------|-------|-------|----------|
| Dnase1l3  | 0.390082083  | 0.00431747  | 0.285 | 0.247 | 1.44E-06 |
| Fam124a   | 0.371969274  | 0.004935294 | 0.274 | 0.198 | 1.65E-06 |
| H2-Aa     | 0.299605547  | 3.80E-05    | 0.756 | 0.663 | 1.27E-08 |
| Ltbp4     | 0.297145584  | 0.01722026  | 0.269 | 0.204 | 5.74E-06 |
| Srgn      | 0.294223888  | 0.000845303 | 0.45  | 0.389 | 2.82E-07 |
| Fermt2    | 0.285786193  | 0.008722634 | 0.255 | 0.185 | 2.91E-06 |
| Mylip     | 0.278223957  | 0.003074858 | 0.374 | 0.296 | 1.02E-06 |
| Clec4d    | 0.253856052  | 9.13E-06    | 0.411 | 0.334 | 3.04E-09 |
| Eng       | -0.262662717 | 0.020237231 | 0.253 | 0.195 | 6.75E-06 |
| Ighm      | -0.27131598  | 0.000641266 | 0.956 | 0.943 | 2.14E-07 |
| Cd24a     | -0.317997804 | 9.43E-08    | 0.525 | 0.591 | 3.14E-11 |
| Vpreb3    | -0.369656798 | 1.23E-06    | 0.444 | 0.512 | 4.09E-10 |
| Clec4f    | -0.416229265 | 0.020080716 | 0.375 | 0.31  | 6.69E-06 |
| Ly6d      | -0.501820103 | 0.000540827 | 0.811 | 0.827 | 1.80E-07 |
| Iglc1     | -0.512507395 | 7.64E-06    | 0.484 | 0.548 | 2.55E-09 |
| Gpr182    | -0.545029462 | 0.00049368  | 0.274 | 0.219 | 1.65E-07 |
| Spib      | -0.560325483 | 0.000169315 | 0.467 | 0.542 | 5.64E-08 |
| Hspa1b    | -0.561846675 | 0.000779261 | 0.312 | 0.38  | 2.60E-07 |
| Zfp36     | -0.631291995 | 1.54E-05    | 0.484 | 0.404 | 5.14E-09 |
| Fam129c   | -0.728015981 | 0.000583259 | 0.285 | 0.341 | 1.94E-07 |
| Ms4a1     | -0.756295985 | 1.53E-06    | 0.849 | 0.853 | 5.09E-10 |
| Tnfrsf13c | -0.7777648   | 0.033396229 | 0.515 | 0.574 | 1.11E-05 |
| Hspa1a    | -1.127398296 | 9.33E-06    | 0.237 | 0.308 | 3.11E-09 |
| Tsc22d3   | -1.251524904 | 5.97E-12    | 0.748 | 0.653 | 1.99E-15 |
| Rasgrp1   | -1.418143464 | 0.002346099 | 0.254 | 0.313 | 7.82E-07 |
| Dnajb1    | -1.634417282 | 0.001235415 | 0.303 | 0.374 | 4.12E-07 |

---

**Supplementary Table 4. Reagents and Resources**

| REAGENT or RESOURCE                           | SOURCE                                   | IDENTIFIER                     |
|-----------------------------------------------|------------------------------------------|--------------------------------|
| <b>Antibodies</b>                             |                                          |                                |
| Rat anti-mouse I-A/I-E-174Yb (M5/114.15.2)    | Fluidigm                                 | Cat #: 3174003B                |
| Rat anti-mouse CD11b-148Nd (M1/70)            | Fluidigm                                 | Cat #: 3148003B                |
| Rat anti-mouse F4/80-159Tb (BM8)              | Fluidigm                                 | Cat #: 3159009B                |
| Rat anti-mouse Ly-6G-141Pr (1A8)              | Fluidigm                                 | Cat #: 3141008B                |
| Hamster anti-mouse CD3e-152Sm (145-2C11)      | Fluidigm                                 | Cat #: 3152004B                |
| Rat anti-mouse CD62L-160Gd (MEL-14)           | Fluidigm                                 | Cat #: 3160008B                |
| Rat anti-mouse CD44-169Tm (IM7)               | Biolegend (antibody)<br>Fluidigm (metal) | Cat #: 103002<br>Cat #: 201300 |
| Mouse anti-mouse MHC Class I-144Nd (28-14-8)  | Fluidigm                                 | Cat #: 3144016B                |
| Rat anti-mouse CD4-145Nd (RM4-5)              | Fluidigm                                 | Cat #: 3145002B                |
| Hamster anti-mouse CD11c-142Nd (N418)         | Fluidigm                                 | Cat #: 3142003B                |
| Rat anti-mouse CD19-149Sm (6D5)               | Fluidigm                                 | Cat #: 3149002B                |
| Rat anti-mouse CD8a-168Er (53-6.7)            | Fluidigm                                 | Cat #: 3168003B                |
| Mouse anti-mouse NK1.1-170Er (PK136)          | Fluidigm                                 | Cat #: 3170002B                |
| Rat anti-mouse CD86-172Yb (GL1)               | Fluidigm                                 | Cat #: 3172016B                |
| Rat anti-mouse CD45R/B220-176Yb (RA3-6B2)     | Biolegend (antibody)<br>Fluidigm (metal) | Cat #: 103249<br>Cat #: 201300 |
| Mouse anti-mouse CD45.2-147Sm (104)           | Fluidigm                                 | Cat #: 3147004B                |
| Rat anti-mouse IgD-156Gd (11-26c.2a)          | Biolegend (antibody)<br>Fluidigm (metal) | Cat #: 405737<br>Cat #: 201300 |
| Rat anti-mouse IgM-151Eu (RMM-1)              | Fluidigm                                 | Cat #: 3151006B                |
| Rat anti-mouse CD5-146Nd (53-7.3)             | Fluidigm                                 | Cat #: 3146012B                |
| Rat anti-mouse TNF $\alpha$ -162Dy (MP6-XT22) | Fluidigm                                 | Cat #: 3162002B                |
| Rat anti-mouse IFN $\gamma$ -166Er (XMG1.2)   | Biolegend (antibody)<br>Fluidigm (metal) | Cat #: 505843<br>Cat #: 201166 |
| Rat anti-mouse IL-6-167Er (MP5-20F3)          | Fluidigm                                 | Cat #: 31670003B               |
| Mouse anti-mouse CD45.2-AF700 (104)           | Biolegend                                | Cat #: 109822                  |
| Mouse anti-mouse CD45.2-V450 (104)            | BD Bioscience                            | Cat #: 560697                  |
| Hamster anti-mouse CD3e-BUV737 (145-2C11)     | BD Bioscience                            | Cat #: 612771                  |



---

|                                                 |                                   |                  |
|-------------------------------------------------|-----------------------------------|------------------|
| Rat anti-mouse CD4-BUV395 (RM4-5)               | BD Bioscience                     | Cat #: 740208    |
| Rat anti-mouse CD8a-BUV805 (53-6.7)             | BD Bioscience                     | Cat #: 564920    |
| Rat anti-mouse CD11b-PE/Cy7 (M1/70)             | Biolegend                         | Cat #: 101216    |
| Rat anti-mouse CD19-BV785 (6D5)                 | Biolegend                         | Cat #: 115543    |
| Rat anti-mouse CD45R/B220-BV421 (RA3-6B2)       | Biolegend                         | Cat #: 103251    |
| Mouse anti-mouse NK1.1-APC (PK136)              | Biolegend                         | Cat #: 108709    |
| Hamster anti-mouse CD11c-BV711 (N418)           | Biolegend                         | Cat #: 117349    |
| Rat anti-mouse Ly-6G-PE (1A8)                   | Biolegend                         | Cat #: 127607    |
| Rat anti-mouse F4/80-FITC (BM8)                 | Biolegend                         | Cat #: 123108    |
| Rat anti-mouse F4/80-AF594 (BM8)                | Biolegend                         | Cat #: 123140    |
| Rat anti-mouse IFN $\gamma$ -PE (XMG1.2)        | Biolegend                         | Cat #: 505807    |
| Rat anti-mouse TNF $\alpha$ -BV650 (MP6-XT22)   | Biolegend                         | Cat #: 506333    |
| Rat anti-mouse IL-2-AF488 (JES6-5H4)            | Biolegend                         | Cat #: 503813    |
| Rat anti-mouse IL-6-PerCP-eFluor 710 (MP5-20F3) | ThermoFisher                      | Cat #: 46706180  |
| Rat anti-mouse CD44-BV711 (IM7)                 | Biolegend                         | Cat #: 103057    |
| Rat anti-mouse CD62L-BV606 (GL-3)               | Biolegend                         | Cat #: 104437    |
| Rat anti-mouse CD86-PE (GL-1)                   | Biolegend                         | Cat #: 105007    |
| Rat anti-mouse I-A/I-E-FITC (M5/114.15.2)       | Biolegend                         | Cat #: 107605    |
| Rat anti-mouse IL-6-PE (MP5-20F3)               | Biolegend                         | Cat #: 504503    |
| Rat anti-mouse IFN $\gamma$ -BV711 (XMG1.2)     | BD Bioscience                     | Cat #: 564336    |
| Rat anti-mouse CD44-PE (IM7)                    | Biolegend                         | Cat #: 103008    |
| Hamster anti-mouse CD11c-APC/Cy7 (N418)         | Biolegend                         | Cat #: 117323    |
| Hamster anti-mouse CD69-BV421 (H1.2F3)          | Biolegend                         | Cat #: 104527    |
| Rat anti-mouse CD16/32 (93)                     | Biolegend                         | Cat #: 101320    |
| Mouse anti-mouse CD20 (5D2)                     | Yinjie Chen,<br>U. of Mississippi | N/A              |
| GP120 isotype control                           | Yinjie Chen,<br>U. of Mississippi | N/A              |
| Mouse anti-human CD19 (clone LE-CD19)           | ThermoFisher                      | Cat #: MA1-81724 |

---

| Biological Samples                                                        |                        |                    |
|---------------------------------------------------------------------------|------------------------|--------------------|
| Human liver biopsies from NAFLD patients                                  | Ghazarian et al. 2017  | N/A                |
| Chemicals, Peptides, and Recombinant Proteins                             |                        |                    |
| Cell stimulation cocktail + protein transport inhibitor                   | ThermoFisher           | Cat #: 00497593    |
| LPS                                                                       | ThermoFisher           | Cat #: 00497093    |
| Protein transport inhibitor                                               | ThermoFisher           | Cat #: 00498003    |
| Pam3CSK4                                                                  | Invivogen              | Cat #: tlr1-kit1mw |
| ODN1826                                                                   | Invivogen              | Cat #: tlr1-kit1mw |
| Cell-ID Cisplatin                                                         | Fluidigm               | Cat #: 201194      |
| Cell-ID Intercalator-Ir                                                   | Fluidigm               | Cat #: 201192B     |
| Pierce 16% Formaldehyde                                                   | ThermoFisher           | Cat #: 28906       |
| Zombie Aqua fixable viability kit                                         | Biolegend              | Cat #: 423102      |
| Maxpar X8 multimetal labeling kit                                         | Fluidigm               | Cat #: 201300      |
| Critical Commercial Assays                                                |                        |                    |
| BD Cytotfix/Cytoperm kit                                                  | BD Bioscience          | Cat #: 554714      |
| ELISA Max Deluxe set mouse TNF $\alpha$                                   | Biolegend              | Cat #: 430904      |
| ELISA Max Deluxe set mouse IL-6                                           | Biolegend              | Cat #: 431304      |
| RNeasy Plus Mini kit                                                      | Qiagen                 | Cat #: 74136       |
| RNeasy MinElute cleanup kit                                               | Qiagen                 | Cat #: 74204       |
| iScript cDNA Synthesis kit                                                | Bio-Rad                | Cat #: 1708890     |
| SYBR Green Supermix                                                       | Bio-Rad                | Cat #: 1708882     |
| Experimental Models: Organisms/Strains                                    |                        |                    |
| Mouse: C57BL/6J                                                           | The Jackson Laboratory | Cat #: 000664      |
| Mouse: $\mu$ Mt (B6.129S2-Ighm <sup>tm1Cgn</sup> /J)                      | The Jackson Laboratory | Cat #: 002288      |
| Mouse: CD19 <sup>cre</sup> (B6.129P2(C)-CD19 <sup>tm1(cre)Cgn</sup> /J)   | The Jackson Laboratory | Cat #: 006785      |
| Mouse: Myd88 <sup>fl/fl</sup> (B6.129P2(SJL)-Myd88 <sup>tm1Defr</sup> /J) | The Jackson Laboratory | Cat #: 008888      |
| Mouse: HEL (C57BL/6-Tg(IghelMD4)4Ccg/J)                                   | The Jackson Laboratory | Cat #: 002595      |

|                                                                  |                        |                 |
|------------------------------------------------------------------|------------------------|-----------------|
| Mouse Nur77 <sup>GFP</sup> (C57BL/6-Tg(Nr4a1-EGFP/cre)820Khog/J) | The Jackson Laboratory | Cat #: 016617   |
| <b>Oligonucleotides</b>                                          |                        |                 |
| Primers for qRT-PCR, See Table S1                                | This paper             | N/A             |
| <b>Software and Algorithms</b>                                   |                        |                 |
| FIJI                                                             | ImageJ                 | imagej.net/Fiji |
| Prism 8.3                                                        | GraphPad               | Version 8       |
| edgeR                                                            | Bioconductor           | Version 3       |
| Ingenuity Pathway Analysis                                       | Qiagen                 | N/A             |

## REFERENCES

1. Revelo XS, Tsai S, Lei H, Luck H, Ghazarian M, Tsui H, Shi SY, et al. Perforin is a novel immune regulator of obesity-related insulin resistance. *Diabetes* 2015;64:90-103.
2. Ghazarian M, Revelo XS, Nohr MK, Luck H, Zeng K, Lei H, Tsai S, et al. Type I Interferon Responses Drive Intrahepatic T cells to Promote Metabolic Syndrome. *Sci Immunol* 2017;2.
3. Revelo XS, Ghazarian M, Chng MH, Luck H, Kim JH, Zeng K, Shi SY, et al. Nucleic Acid-Targeting Pathways Promote Inflammation in Obesity-Related Insulin Resistance. *Cell Rep* 2016;16:717-730.
4. Hafemeister C, Satija R. Normalization and variance stabilization of single-cell RNA-seq data using regularized negative binomial regression. *Genome Biol* 2019;20:296.
5. Becht E, McInnes L, Healy J, Dutertre CA, Kwok IWH, Ng LG, Ginhoux F, et al. Dimensionality reduction for visualizing single-cell data using UMAP. *Nat Biotechnol* 2018.
6. Aran D, Looney AP, Liu L, Wu E, Fong V, Hsu A, Chak S, et al. Reference-based analysis of lung single-cell sequencing reveals a transitional profibrotic macrophage. *Nat Immunol* 2019;20:163-172.
7. Linares-Cervantes I, Echeverri J, Cleland S, Kathis JM, Rosales R, Goto T, Kollmann D, et al. Predictor parameters of liver viability during porcine normothermic ex situ liver perfusion in a model of liver transplantation with marginal grafts. *Am J Transplant* 2019;19:2991-3005.
8. Staley C, Kaiser T, Beura LK, Hamilton MJ, Weingarden AR, Bobr A, Kang J, et al. Stable engraftment of human microbiota into mice with a single oral gavage following antibiotic conditioning. *Microbiome* 2017;5:87.
9. Brunt EM, Kleiner DE, Wilson LA, Belt P, Neuschwander-Tetri BA, (CRN) NCRN. Nonalcoholic fatty liver disease (NAFLD) activity score and the histopathologic diagnosis in NAFLD: distinct clinicopathologic meanings. *Hepatology* 2011;53:810-820.

10. Bruzzi S, Sutti S, Giudici G, Burlone ME, Ramavath NN, Toscani A, Bozzola C, et al. B2-Lymphocyte responses to oxidative stress-derived antigens contribute to the evolution of nonalcoholic fatty liver disease (NAFLD). *Free Radic Biol Med* 2018;124:249-259.
